# Supplementary material for: A mitochondrial-targeting iridium(iii) complex for H2O2-responsive and oxidative stress amplified two-photon photodynamic therapy
Source: Royal Society of Chemistry journal article supplement (doi:10.1039/d1qi01038g), 2021-01-01
Supplement: d1qi01038g1.pdf [file d1qi01038g1.pdf]

## Supporting Information

### **A mitochondrial-targeting iridium(III) complex for H<sub>2</sub>O<sub>2</sub>-responsive and oxidative stress amplified two-photon photodynamic therapy**

Xinxing Liao,<sup>a,‡</sup> Jinchao Shen,<sup>a,‡</sup> Weijun Wu,<sup>a,‡</sup> Shi Kuang,<sup>a</sup> Mingwei Lin,<sup>a</sup>  
Johannes Karges,<sup>b</sup> Zilong Tang,<sup>\*c</sup> and Hui Chao,<sup>\*a,c</sup>

<sup>a</sup> MOE Key Laboratory of Bioinorganic and Synthetic Chemistry, School of Chemistry, Sun Yat-Sen University, Guangzhou 510006, China. E-mail: [ceschh@mail.sysu.edu.cn](mailto:ceschh@mail.sysu.edu.cn)

<sup>b</sup> Department of Chemistry and Biochemistry, University of California, San Diego, 9500 Gilman Drive, La Jolla, CA 92093, United State

<sup>c</sup> MOE Key Laboratory of Theoretical Organic Chemistry and Functional Molecule, School of Chemistry and Chemical Engineering, Hunan University of Science and Technology, Xiangtan, 400201, China. E-mail: [zltang@hnust.edu.cn](mailto:zltang@hnust.edu.cn)

<sup>‡</sup> These authors contributed equally to this work.

Supporting Figures and Tables

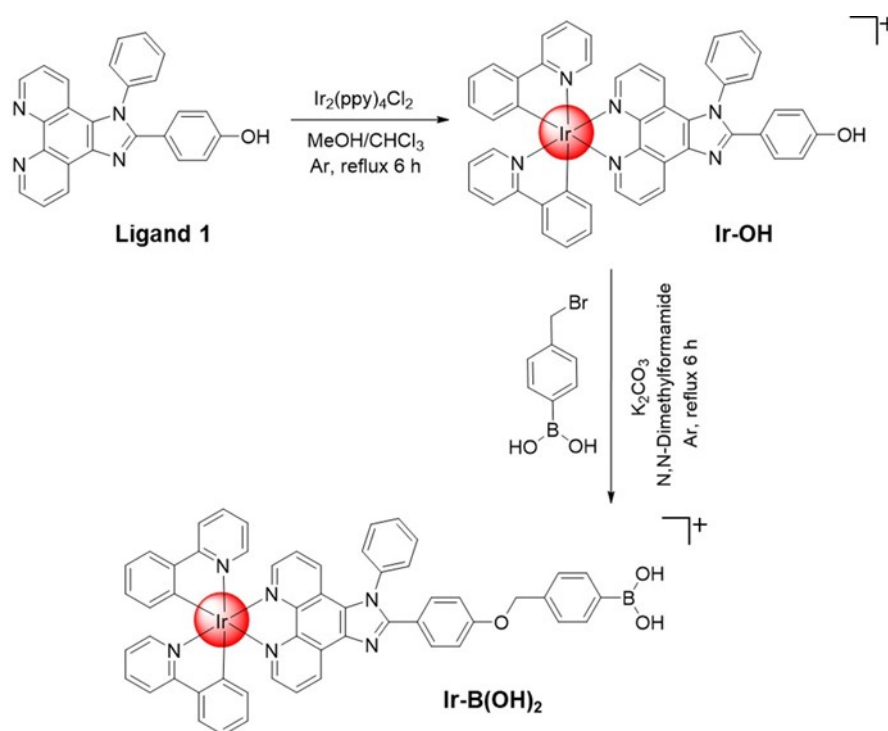

Scheme S1. Synthetic route of Ir-B(OH)<sub>2</sub>.

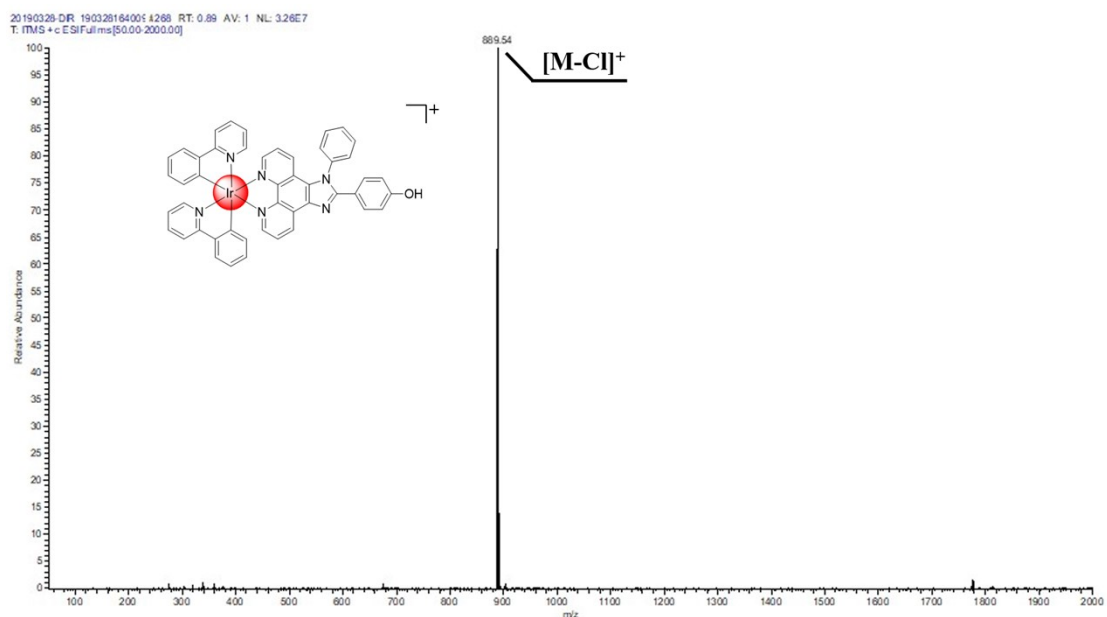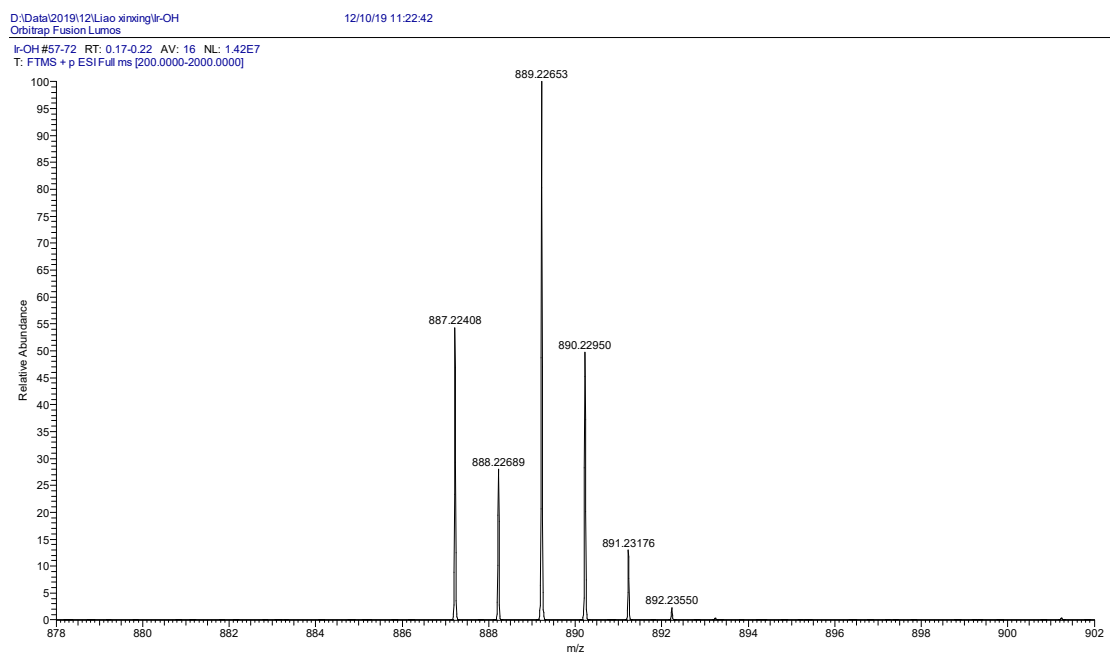

**Figure S1.** ESI-MS spectrum and HRMS spectrum of Ir-OH.

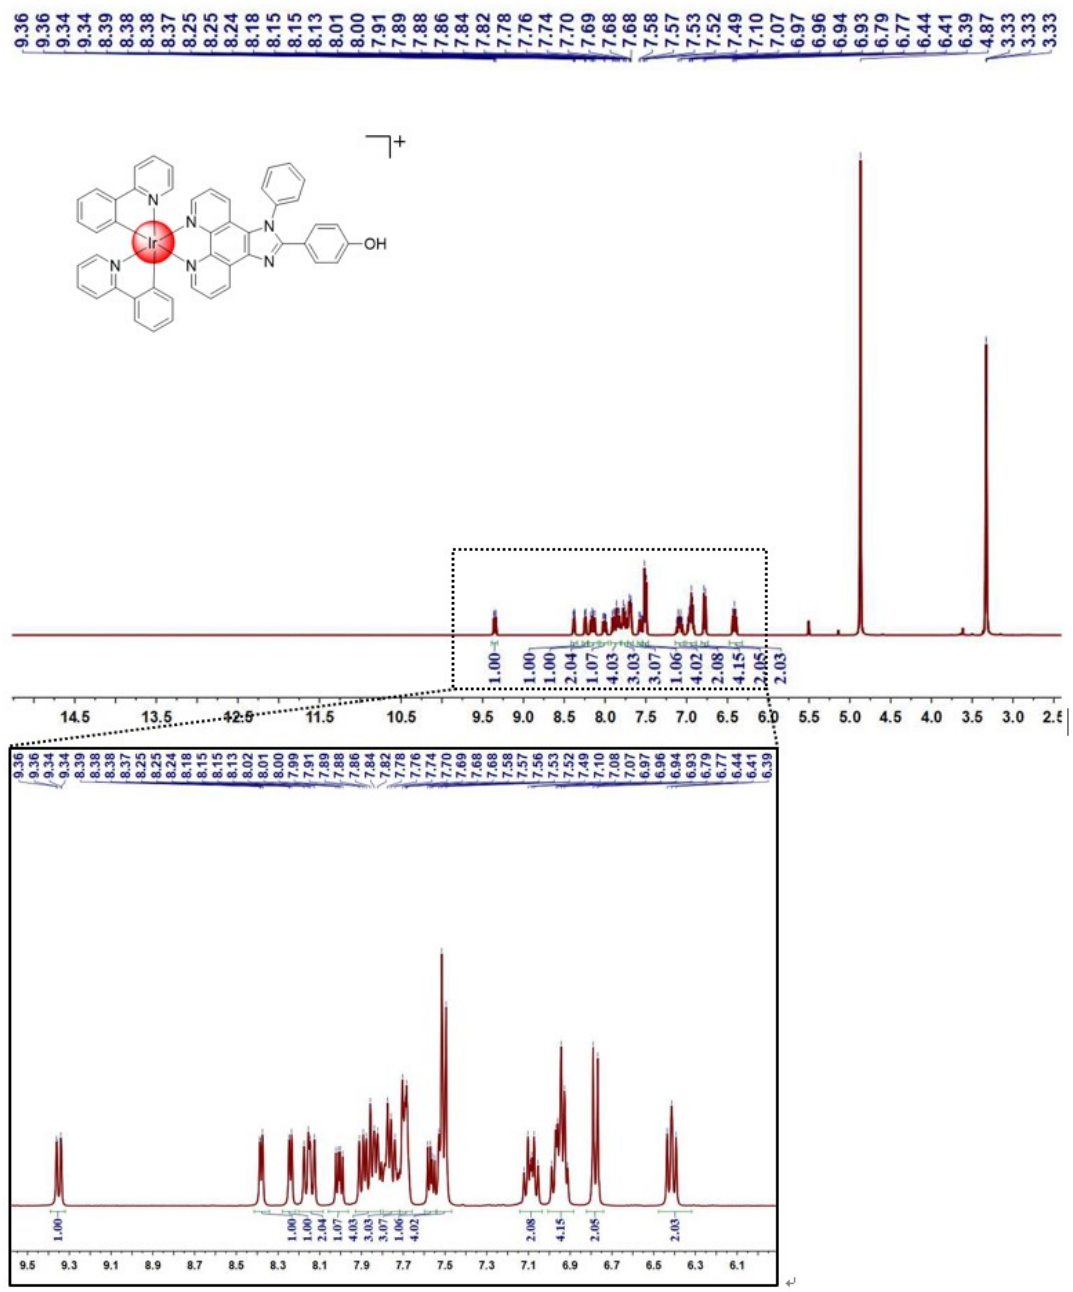

Figure S2. <sup>1</sup>H NMR spectrum of Ir-OH.

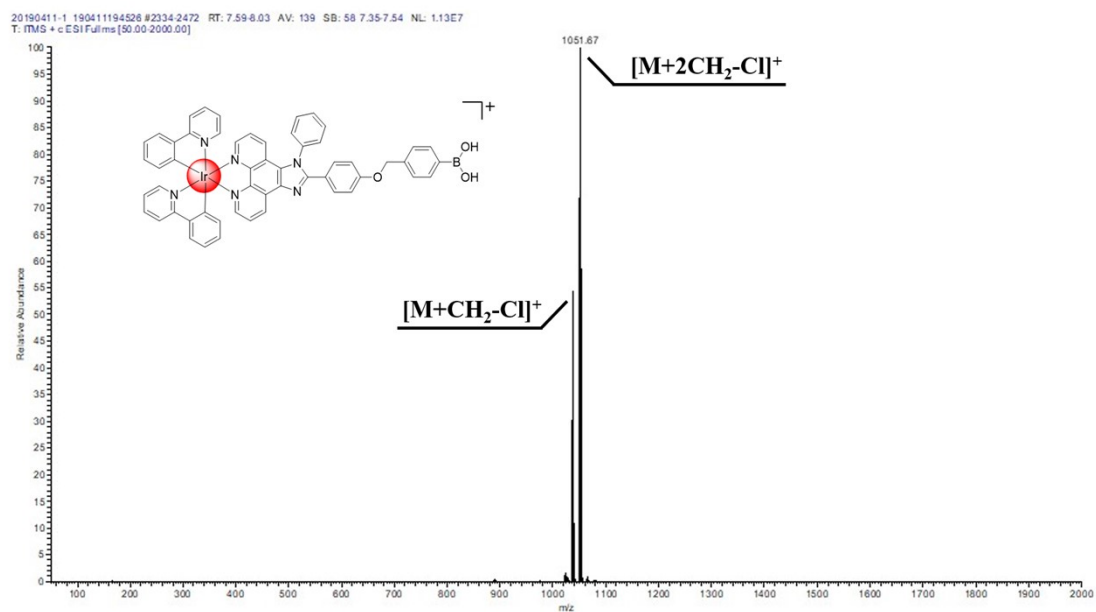

D:\Data\Liiao xinxing\1912A0168-HRMS 12/06/19 14:58:35  
Orbitrap Fusion Lumos

1912A0168-HRMS #21-28 RT: 0.06-0.08 AV: 8 NL: 9.70E6  
T: FTMS + p ESI Full ms [200.0000-2000.0000]

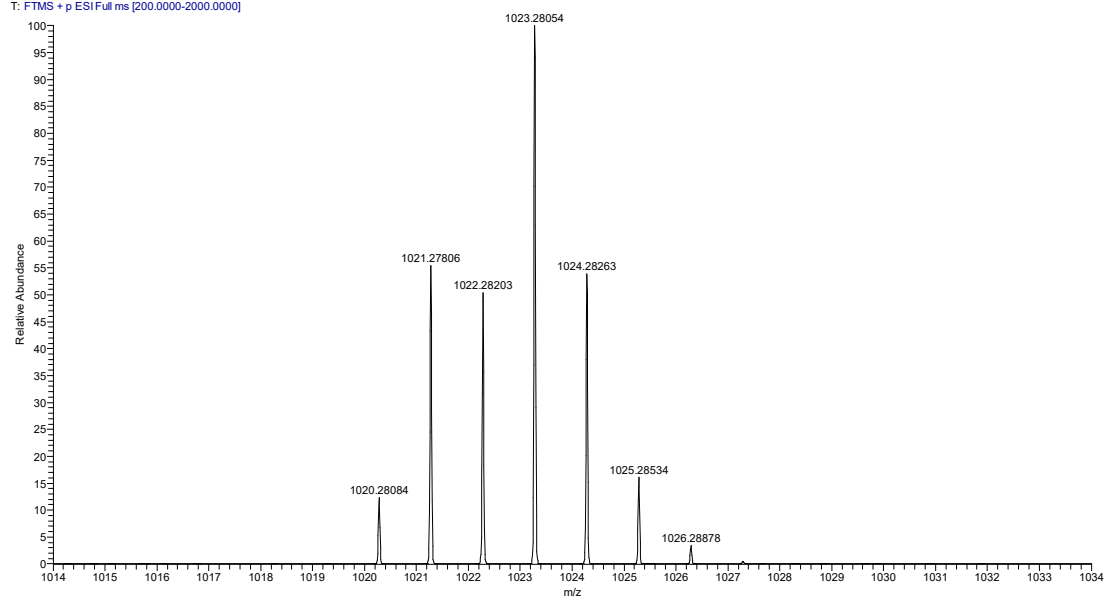

Figure S3. ESI-MS spectrum and HRMS spectrum of Ir-B(OH)<sub>2</sub>.

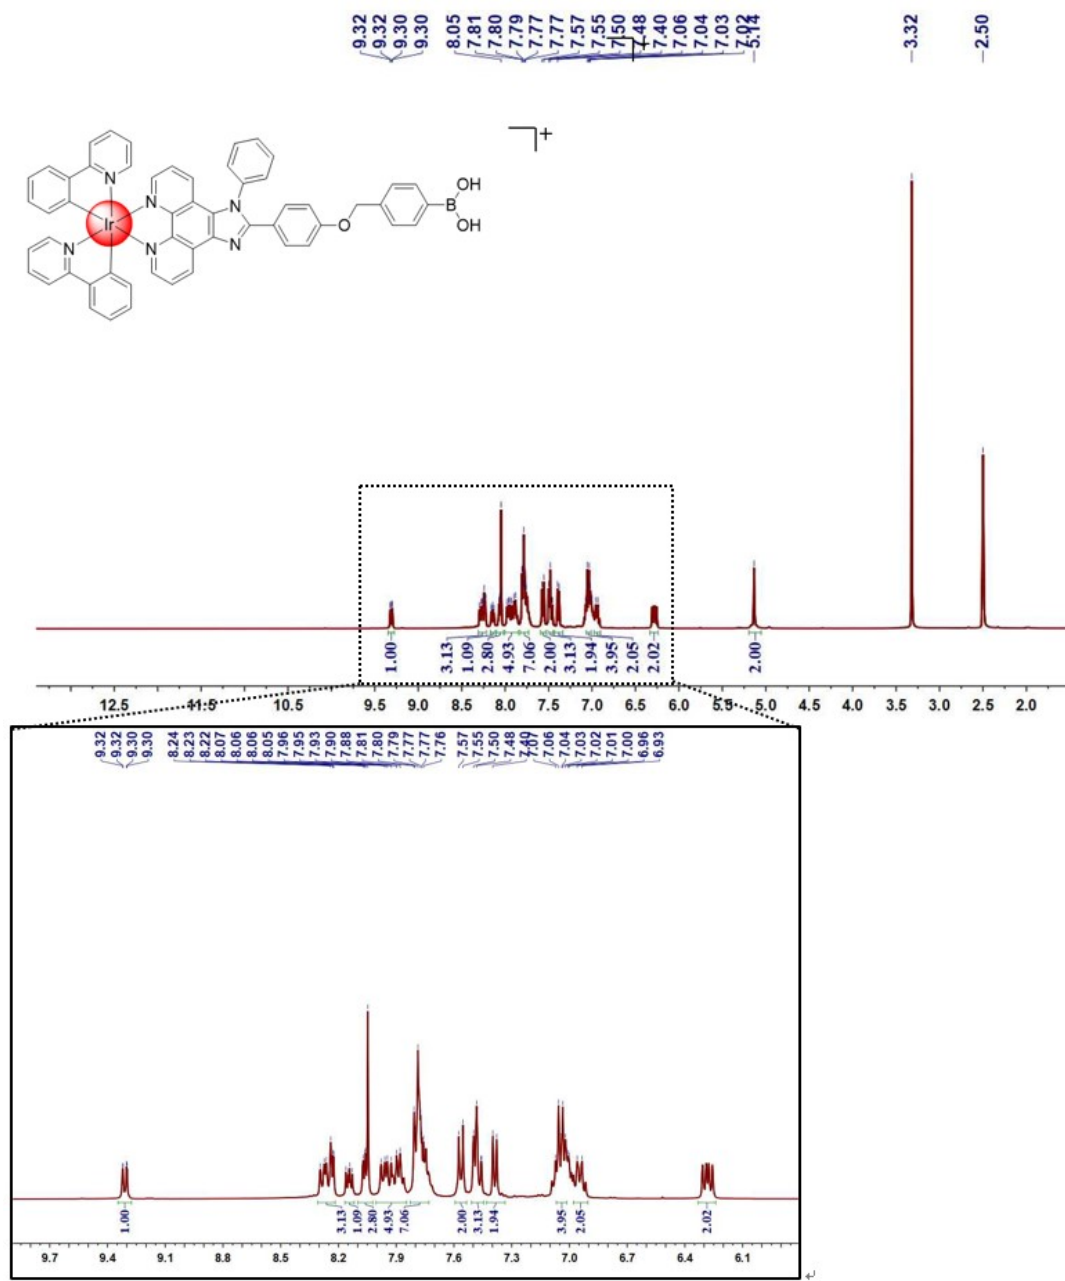

Figure S4.  $^1\text{H}$  NMR spectrum of  $\text{Ir-B(OH)}_2$ .

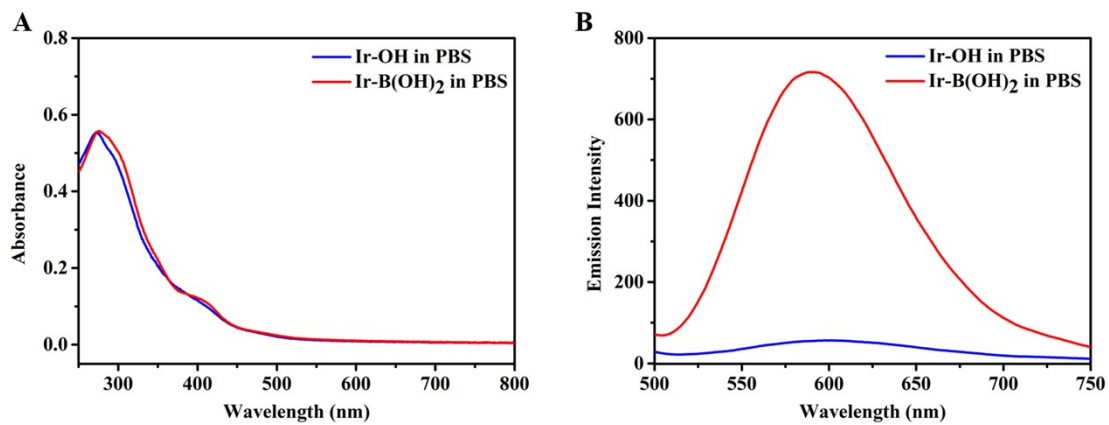

**Figure S5.** UV-Vis absorption spectra (A), and emission spectra (B) of Ir-OH (10 μM), and Ir-B(OH)<sub>2</sub> (10 μM) in PBS.

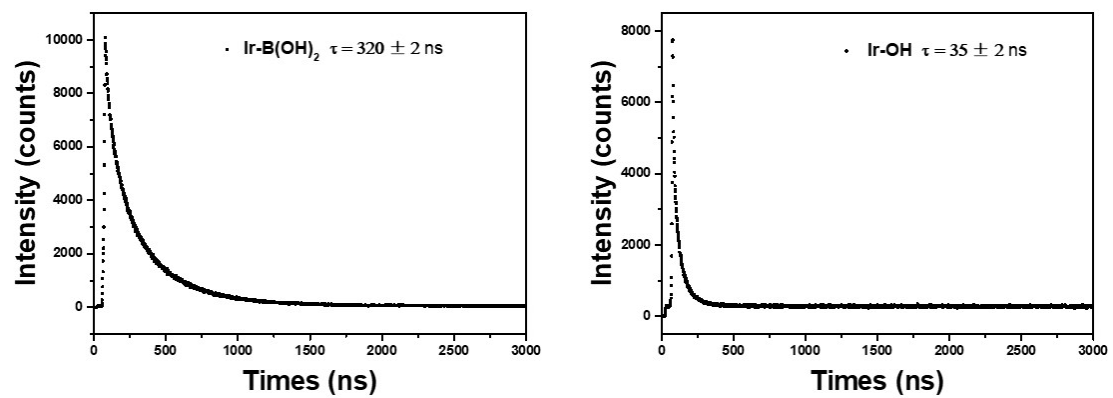

**Figure S6.** Luminescence lifetime spectra of Ir-OH (10 μM), and (B) Ir-B(OH)<sub>2</sub> (10 μM) in PBS.



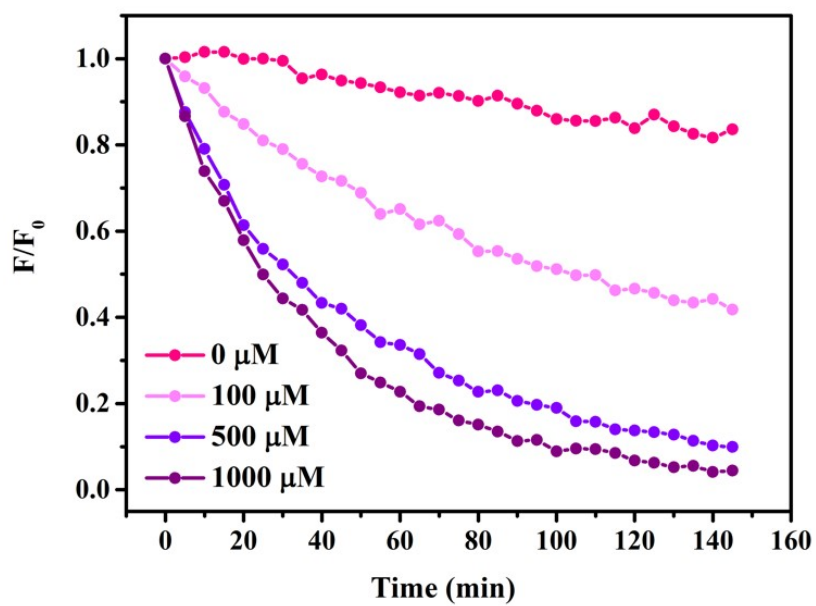

**Figure S7.** Monitoring of changes in the emission intensity at 589 nm of  $Ir-B(OH)_2$  (2.0  $\mu M$ ) upon treatment with various  $H_2O_2$  concentrations at various time points.

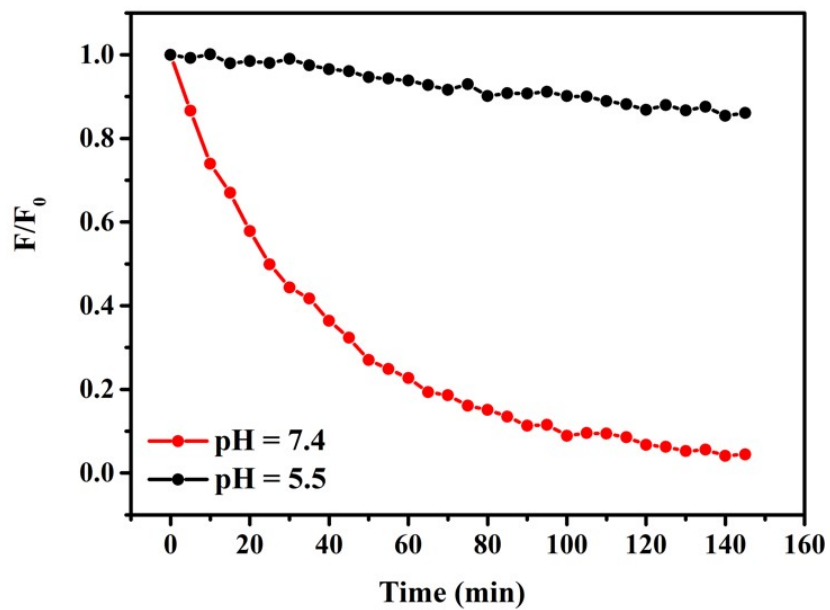

**Figure S8.** Monitoring of changes in the emission intensity at 589 nm of Ir-B(OH)<sub>2</sub> (2.0 μM) upon treatment with H<sub>2</sub>O<sub>2</sub> at various time points under physiological (pH = 7.4) or acidic conditions (pH = 5.5).

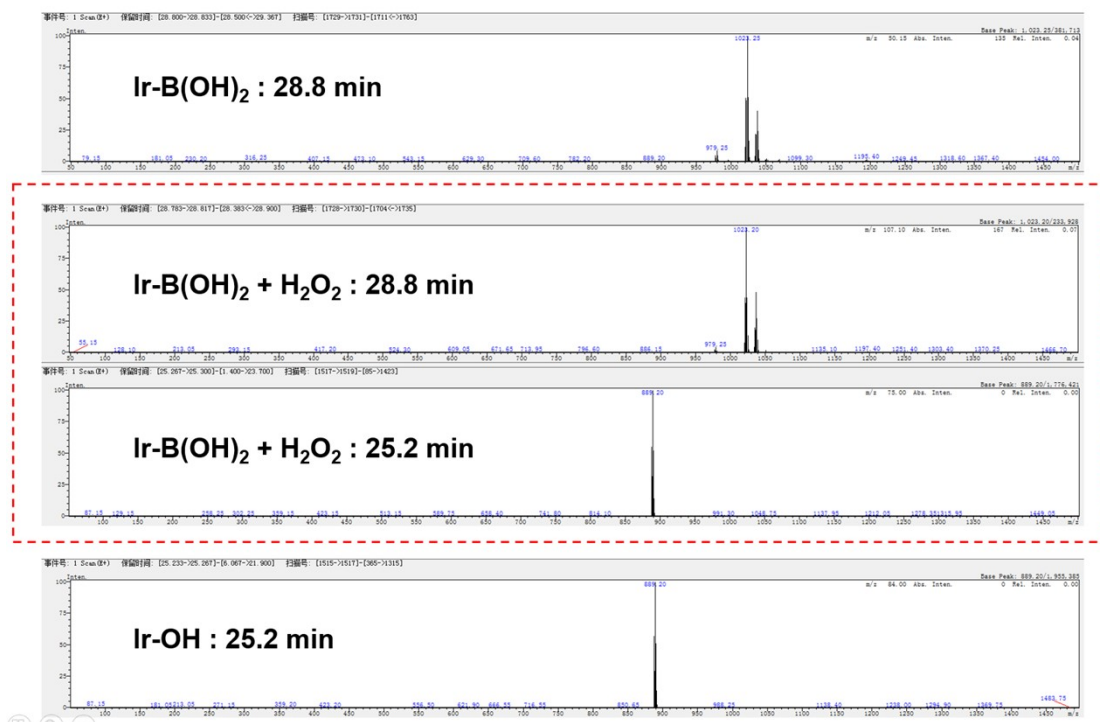

**Figure S9.** Mass spectrum at the corresponding retention time upon incubation of Ir-B(OH)<sub>2</sub> with H<sub>2</sub>O<sub>2</sub>.

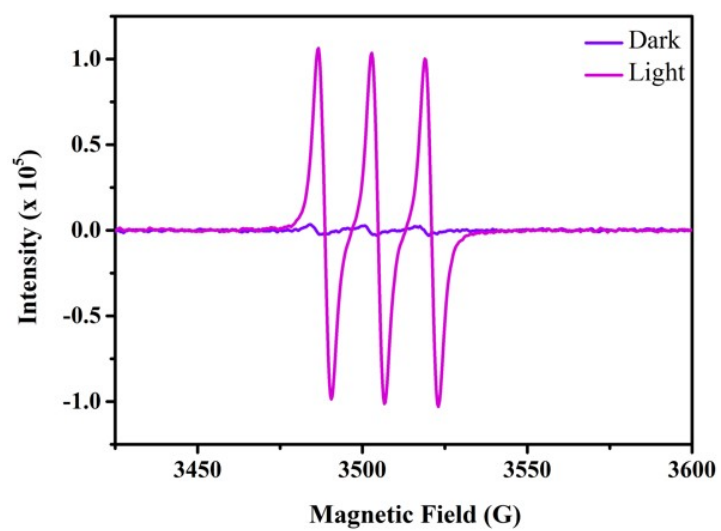

**Figure S10.** Electron spin resonance spectrum of  $\text{Ir-B(OH)}_2$  ( $2.0 \mu\text{M}$ ) upon incubation of 2,2,6,6-tetramethylpiperidine and exposure to a 405 nm irradiation ( $20 \text{ mW cm}^{-2}$ , 300 s).

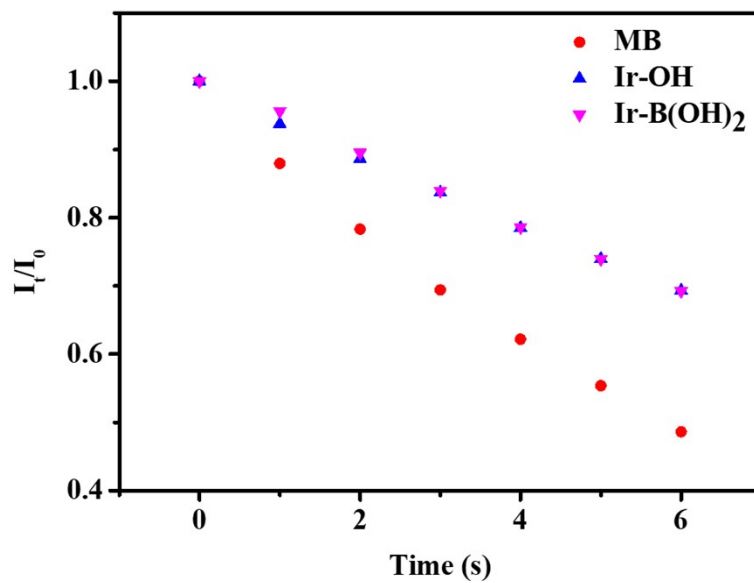

**Figure S11.** Changes in the absorbance at 411 nm (absorption of 1,3-diphenylisobenzofuran (DPBF)) upon incubation of the metal complexes **Ir(OH)** or **Ir-B(OH)<sub>2</sub>** with the <sup>1</sup>O<sub>2</sub> scavenger DPBF. MB was used as the standard.

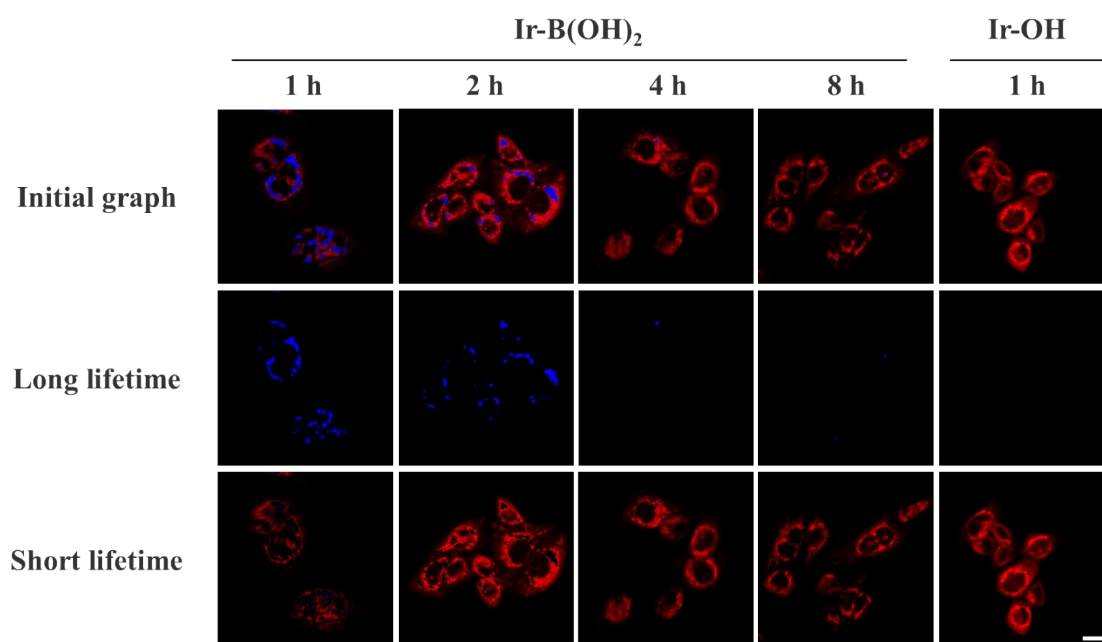

**Figure S12.** Phosphorescence lifetime images of AGS cells incubated with Ir-B(OH)<sub>2</sub> (0.5 μM) for 1, 2, 4, 8 h or Ir-OH (0.5 μM) for 1h ( $\lambda_{\text{ex}} = 730 \text{ nm}$ ). Scale bar: 10 μm.

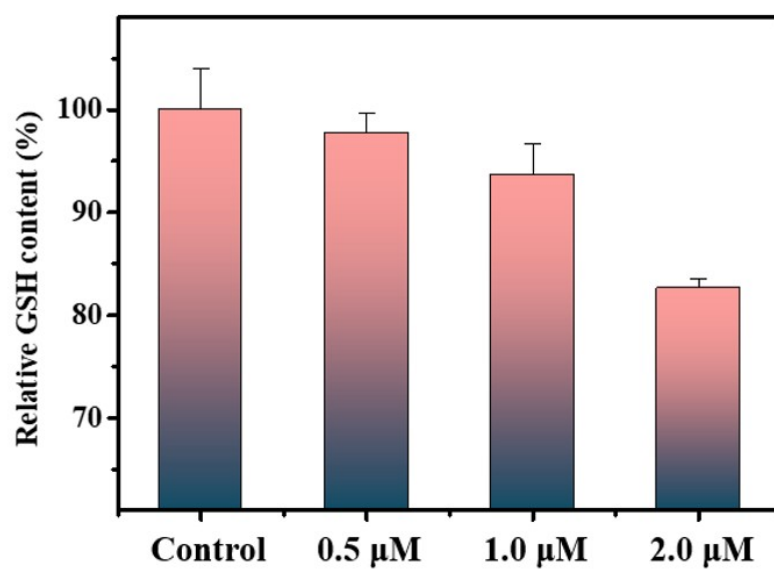

**Figure S13.** Relative intracellular GSH level of AGS cells upon treatment with various concentrations of Ir-B(OH)<sub>2</sub>.

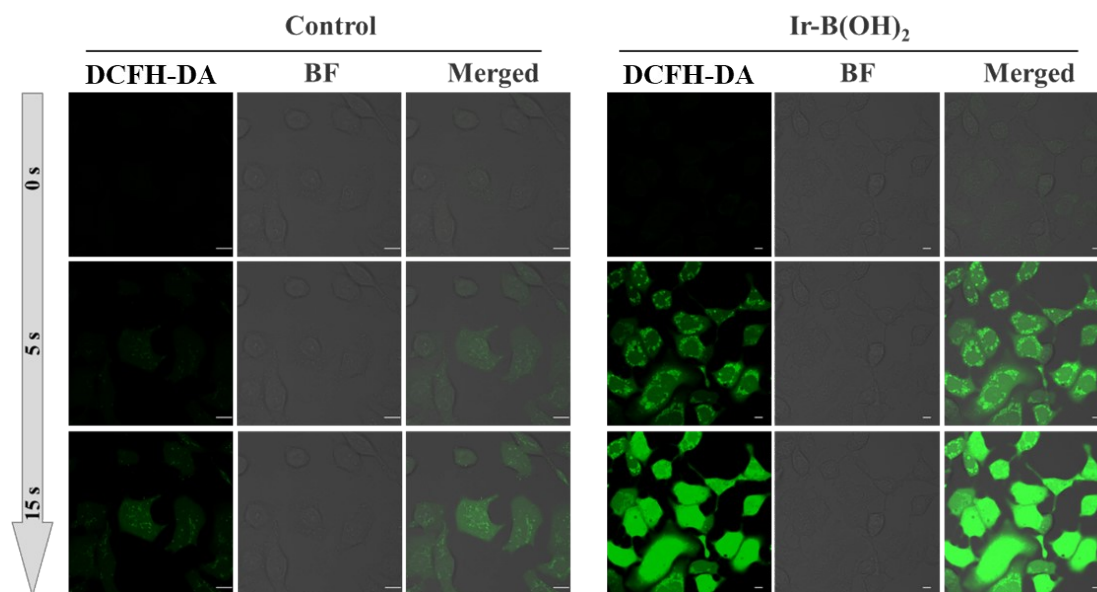

**Figure S14.** Fluorescence images of AGS cells incubated with Ir-B(OH)<sub>2</sub> (0.5 μM), stained with 2,7-dichlorodihydrofluorescein diacetate (10 μM,  $\lambda_{\text{ex}} = 488 \text{ nm}$ ,  $\lambda_{\text{em}} = 510 \pm 10 \text{ nm}$ ) and exposure to a laser irradiation (405 nm, 20 mW cm<sup>-2</sup>, 300 s). Scale bar: 10 μm.



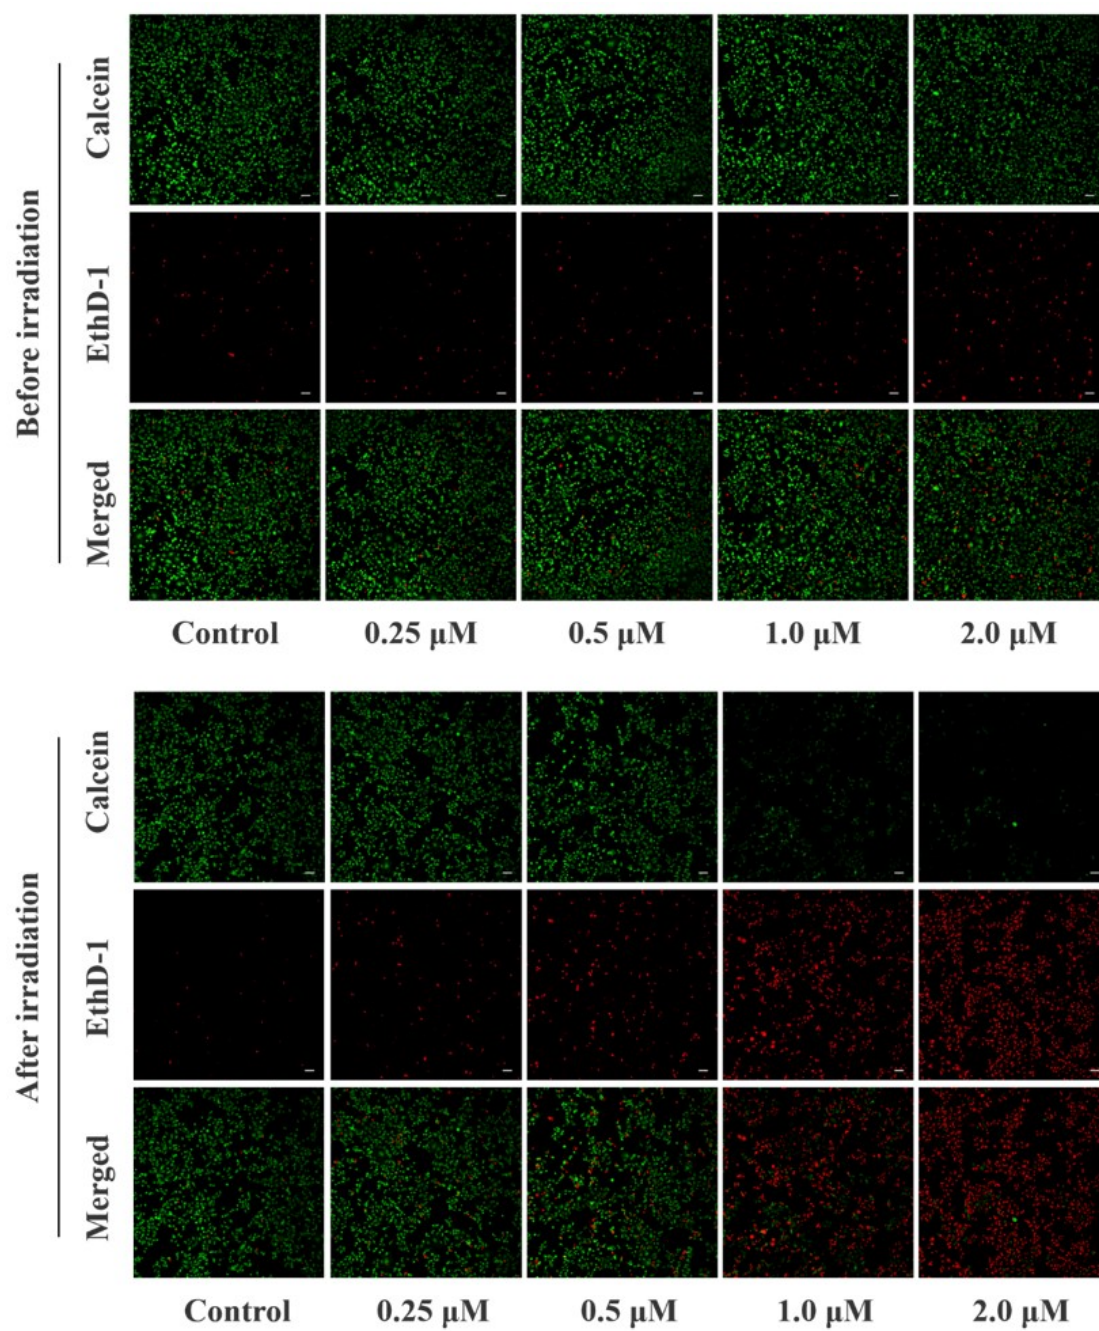

**Figure S15.** Fluorescent microscopy images of AGS cells incubated with  $\text{Ir-B(OH)}_2$  before and after a 405 nm laser ( $20 \text{ mW cm}^{-2}$ , 300 s) irradiation. Afterwards, the cells were stained with Calcein-AM/EthD-1 (Calcein-AM for live cells,  $2 \mu\text{M}$ ,  $\lambda_{\text{ex}} = 488 \text{ nm}$ ,  $\lambda_{\text{em}} = 510 \pm 10 \text{ nm}$ ; EthD-1 for dead cells,  $4 \mu\text{M}$ ,  $\lambda_{\text{ex}} = 543 \text{ nm}$ ,  $\lambda_{\text{em}} = 610 \pm 10 \text{ nm}$ ). Scale bar =  $100 \mu\text{m}$ .

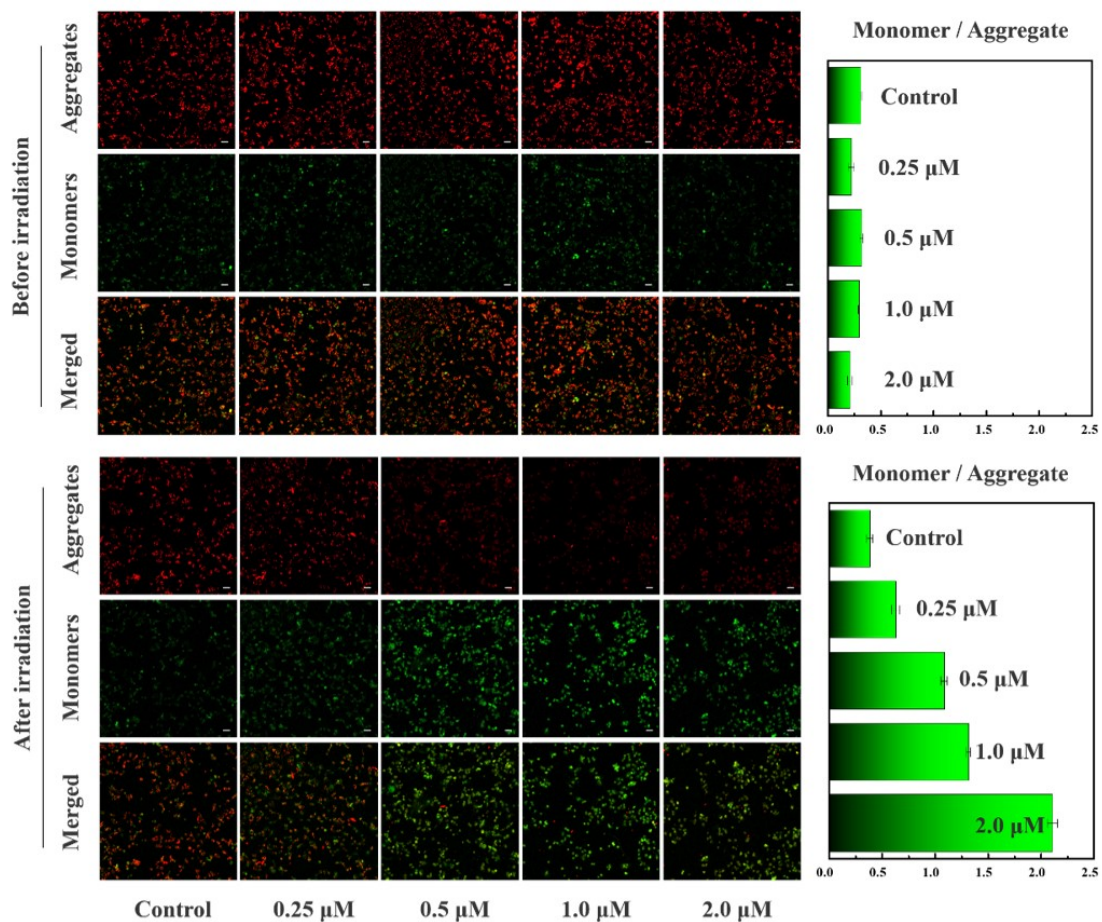

**Figure S16.** Confocal microscopy images upon incubation of Ir-B(OH)<sub>2</sub> and JC-1 in AGS cells before or after a 405 nm laser (20 mW cm<sup>-2</sup>, 300 s) irradiation. The JC-1 monomer/aggregate ratio is indicative for the mitochondrial membrane potential. Monomer:  $\lambda_{\text{ex}} = 488 \text{ nm}$ ,  $\lambda_{\text{em}} = 510 \pm 10 \text{ nm}$ , Aggregate:  $\lambda_{\text{ex}} = 543 \text{ nm}$ ,  $\lambda_{\text{em}} = 610 \pm 10 \text{ nm}$ , Scale bar = 50 μm.

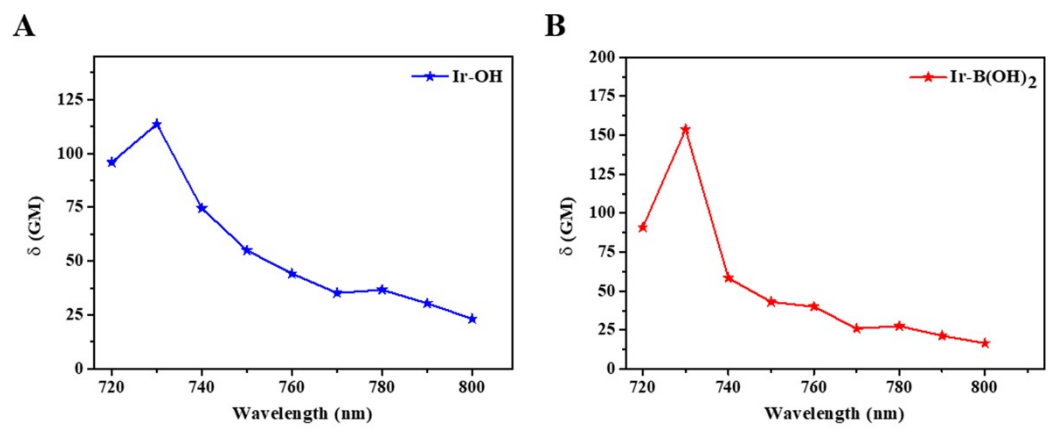

Figure S17. Two-photon absorption spectra of (A) Ir-OH (1 mM), and (B) Ir-B(OH)<sub>2</sub> (1 mM).

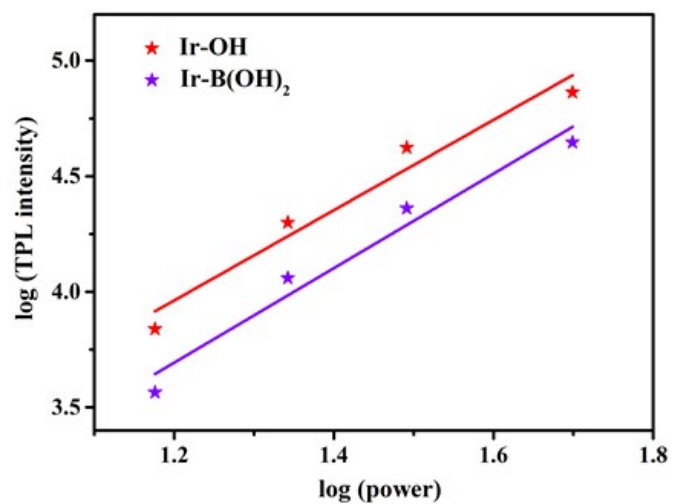

**Figure S18.** Laser power in dependence of relative two-photo induced phosphorescence intensity of Ir-OH(1 mM), and Ir-B(OH)<sub>2</sub> (1 mM).

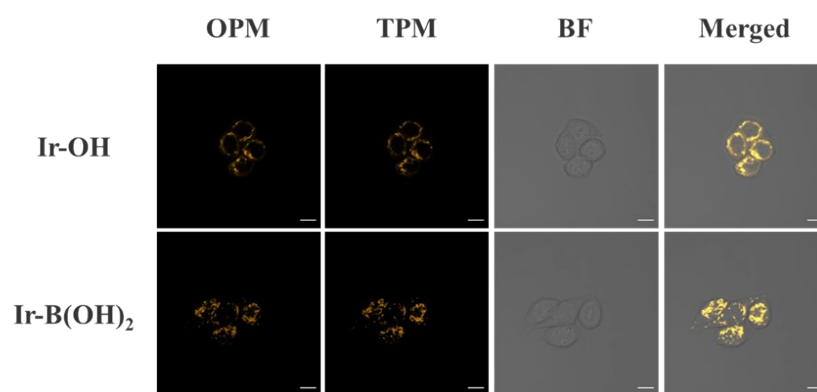

**Figure S19.** One and two-photon excited confocal laser scanning microscopy images of **Ir-OH** (0.5  $\mu\text{M}$ ) and **Ir-B(OH)<sub>2</sub>** (0.5  $\mu\text{M}$ ) in AGS monolayer cells. Scale bar = 10  $\mu\text{m}$ .



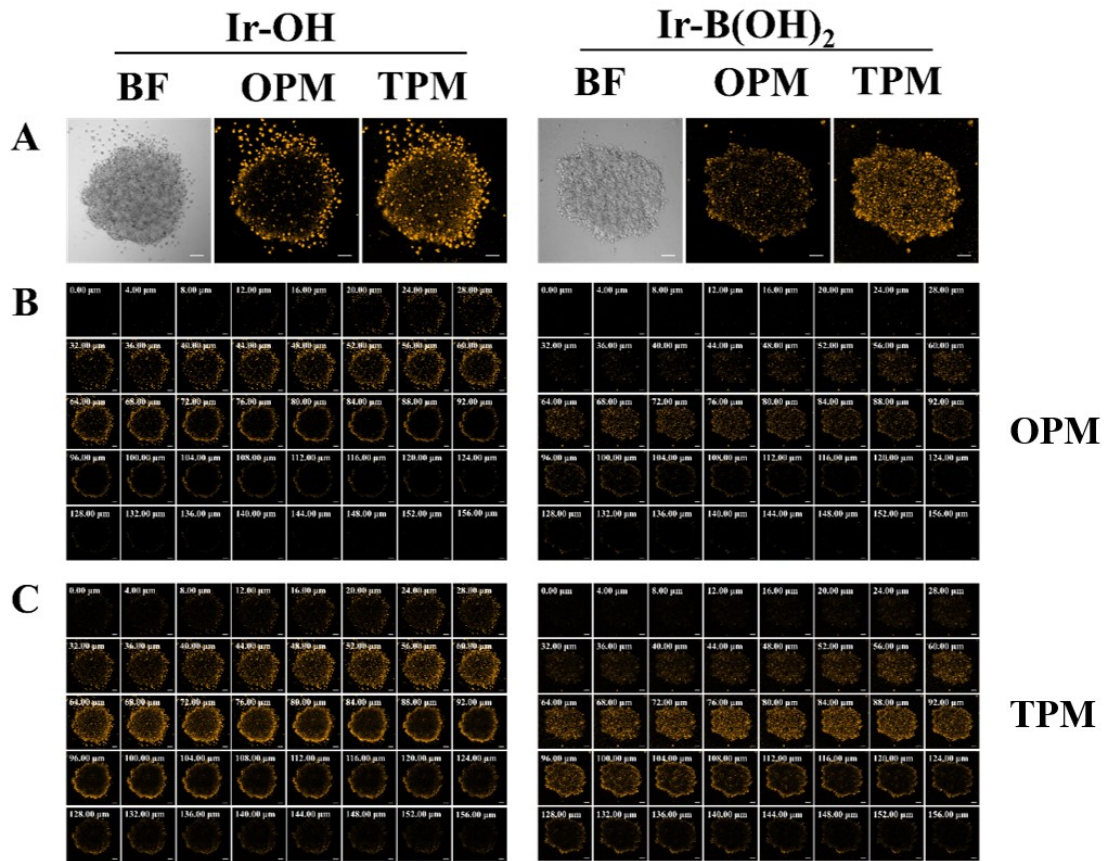

**Figure S20.** (A) One-photon (OPM) and two-photon (TPM) fluorescence microscopy images of **Ir-OH** (0.5  $\mu\text{M}$ ) and **Ir-B(OH)<sub>2</sub>** (0.5  $\mu\text{M}$ ) in an intact 3D multi-cellular spheroid. Z-stack of (B) OPM and (C) TPM images of **Ir-OH** or **Ir-B(OH)<sub>2</sub>** in AGS 3D multi-cellular spheroids. The images were taken every  $\sim 4.00 \mu\text{m}$  section along the Z axis of an intact spheroid. Scale bar = 100  $\mu\text{m}$ .

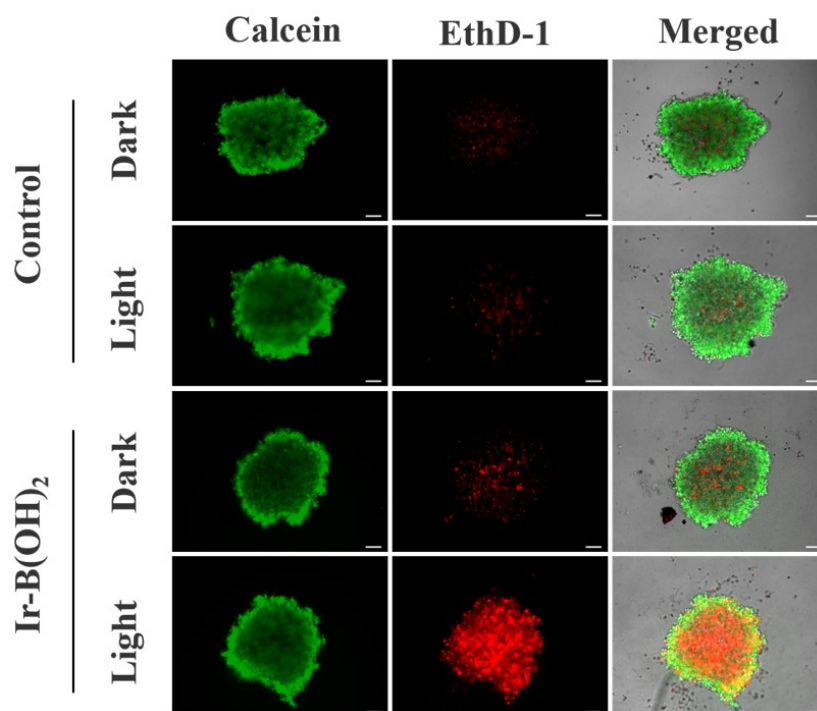

**Figure S21.** Fluorescence microscopy images of AGS MCTS incubated with **Ir-B(OH)<sub>2</sub>** (0, 0.5  $\mu\text{M}$ ) upon treatment in the dark or exposure to a two-photon irradiation (730 nm, 20  $\text{mW cm}^{-2}$ , 300 s). Afterwards the MCTS were stained with Calcein-AM/EthD-1 (Calcein-AM is a stain for living cells, 2 $\mu\text{M}$ ,  $\lambda_{\text{ex}}$  = 488 nm,  $\lambda_{\text{em}}$  = 510  $\pm$  10 nm; EthD-1 is a stain for dead cells, 4 $\mu\text{M}$ ,  $\lambda_{\text{ex}}$  = 543 nm,  $\lambda_{\text{em}}$  = 610  $\pm$  10 nm). Scale bar = 100  $\mu\text{m}$ .

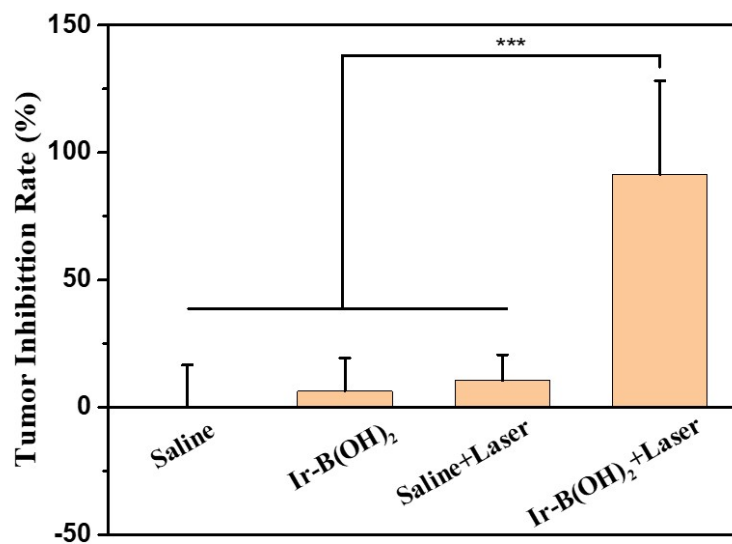

Figure S22. Change in tumor-inhibition rate after different treatments.



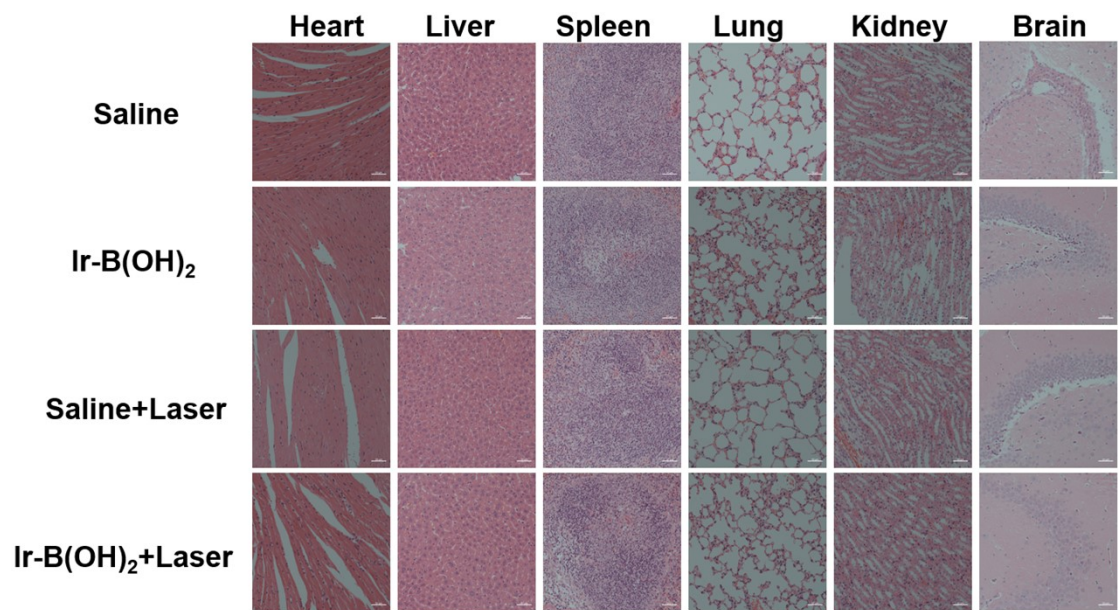

**Figure S23.** Histopathologic slices upon staining with hematoxylin and eosin (H&E) of the major organs (heart, liver, spleen, lung, kidney and brain) of AGS tumor-bearing mice after different treatments. Scale bar = 50  $\mu$ m.

**Table S1.** (Photo)cytotoxicity towards different cell lines upon 405 nm laser irradiation.

| Complexes                   |       | IC <sub>50</sub> (μM) <sup>[a]</sup> |           |           |          |
|-----------------------------|-------|--------------------------------------|-----------|-----------|----------|
|                             |       | AGS                                  | A549      | Hela      | L02      |
| <b>Ir-B(OH)<sub>2</sub></b> | Dark  | 24±1.5                               | 18 ±1.1   | 20±1.3    | 45±1.4   |
|                             | Light | 0.51±0.04                            | 2.86±0.03 | 2.62±0.03 | 6.1±0.01 |
|                             | PI    | 47                                   | 6.3       | 7.6       | 7.4      |
| Cisplatin                   | Dark  | 24.6±1.1                             | 21.2±1.1  | 15.4±0.7  | 15.9±0.8 |
|                             | Light | 23.4±1.3                             | 22.1±0.9  | 14.8±1.3  | 16.1±0.7 |
|                             | PI    | 1.1                                  | 0.95      | 1.0       | 0.99     |

[a] Data are presented as means ± s.d. (n=3).
